# Supplementary material for: Insights into the Distinguishing Stress-induced Cytotoxicity of Chiral Gold Nanoclusters and the Relationship with GSTP1
Source: PubMed Central journal article supplement — Theranostics. 2015 Jan 1;5(2):134–49. doi: 10.7150/thno.10363 (PMC4279000; doi:10.7150/thno.10363), 2015-01-01
Supplement: thnov05p0134s1.pdf [file thnov05p0134s1.pdf]

## Supplementary information

### Insights into the Distinguishing Stress-induced Cytotoxicity of Chiral Gold Nanoclusters and the Relationship with GSTP1

Chunlei Zhang<sup>1</sup>, Zhijun Zhou<sup>1</sup>, Xiao Zhi<sup>1</sup>, Yue Ma<sup>1</sup>, Kan Wang<sup>1</sup>, Yuxia Wang<sup>2</sup>, Yingge Zhang<sup>2</sup>, Hualin Fu<sup>1</sup>, Weilin Jin<sup>1</sup>, Fei Pan<sup>1</sup> and Daxiang Cui<sup>1\*</sup>

1. Institute of Nano Biomedicine and Engineering, Key Laboratory for Thin Film and Microfabrication Technology of the Ministry of Education, Department of Instrument Science & Engineering, School of Electronic, Information and Electrical Engineering, Shanghai Jiao Tong University, 800 Dongchuan RD, Shanghai 200240, China.

Daxiang Cui, E-mail: dxcui@sjtu.edu.cn; Tel&Fax: +86 021-34206886

2. Institute of Pharmacology and Toxicology, Academy of Military Medical Sciences, 47 Taping Road, Peking 100850, PR China

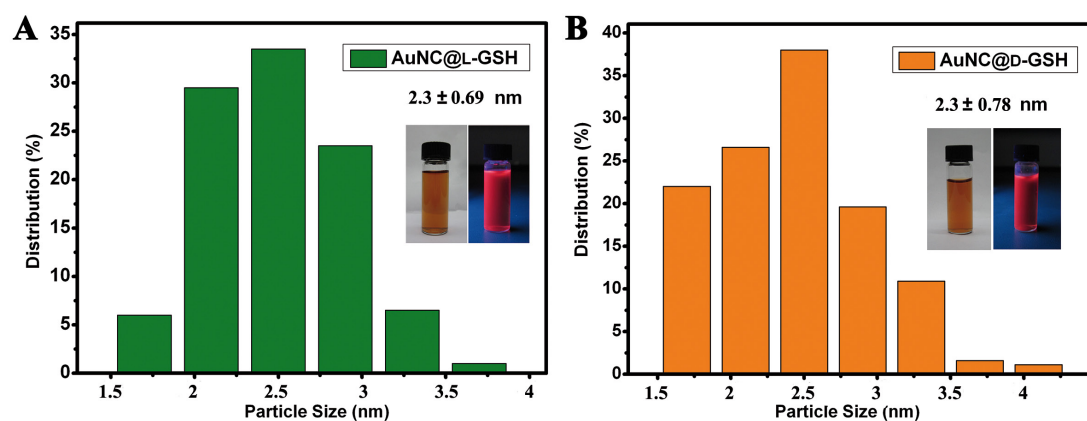

**Figure S1.** Size distribution of (A) AuNCs@L-GSH and (B) AuNCs@D-GSH. (Insets) Digital photos of (A) L-GSH- and (B) D-GSH-capped Au NCs under visible (left) and hand-held UV lamp (right) light (365 nm).

**Table S1.** Physicochemical properties of Au NCs

| Au NCs [nm] | Surface modification | Dynamic diameter <sup>[a]</sup> | $\zeta$ -potential <sup>[b]</sup> [mv] |
|-------------|----------------------|---------------------------------|----------------------------------------|
| AuNCs@L-GSH | L-GSH                | 3.6±0.3                         | -12.5±0.4                              |
| AuNCs@D-GSH | D-GSH                | 3.7±0.4                         | -12.1±0.5                              |

[a] The dynamic diameter of the Au NCs was the dynamic light scattering analysis of hydrodynamic diameter in aqueous solution; [b] The Zeta potentials of AuNCs were measured in aqueous solution of pH 7.0.

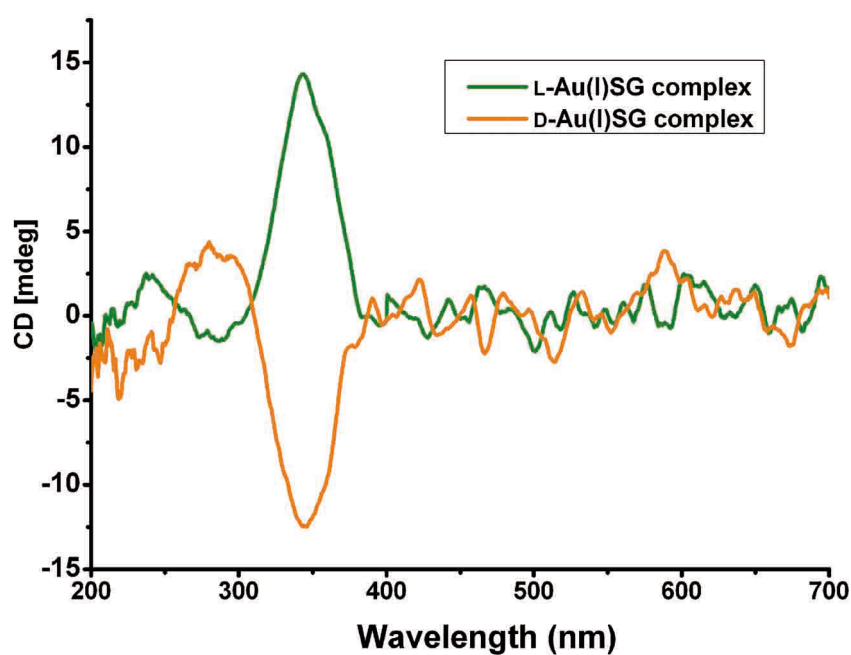

**Figure S2.** CD spectra of Au(I)-SG complexes. Note that SG represents glutathione in thiolate form.

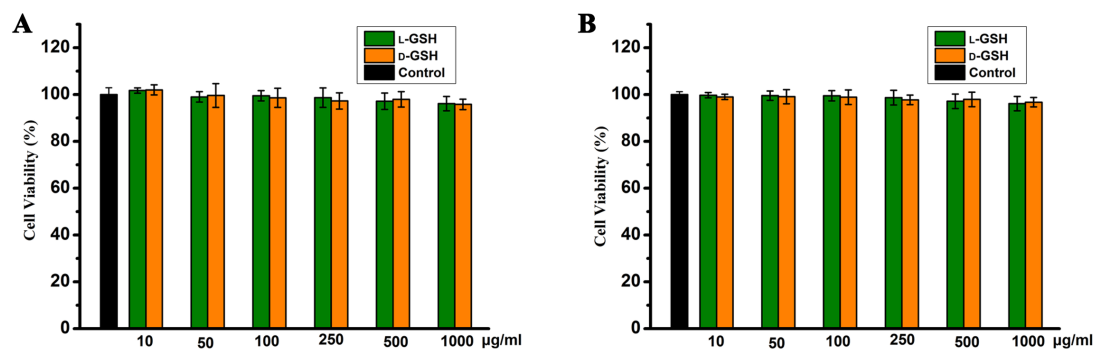

**Figure S3.** Cell viability of (A) MGC-803 and (B) GES-1 cells after co-incubation with different concentrations of L-GSH and D-GSH for 24 h.

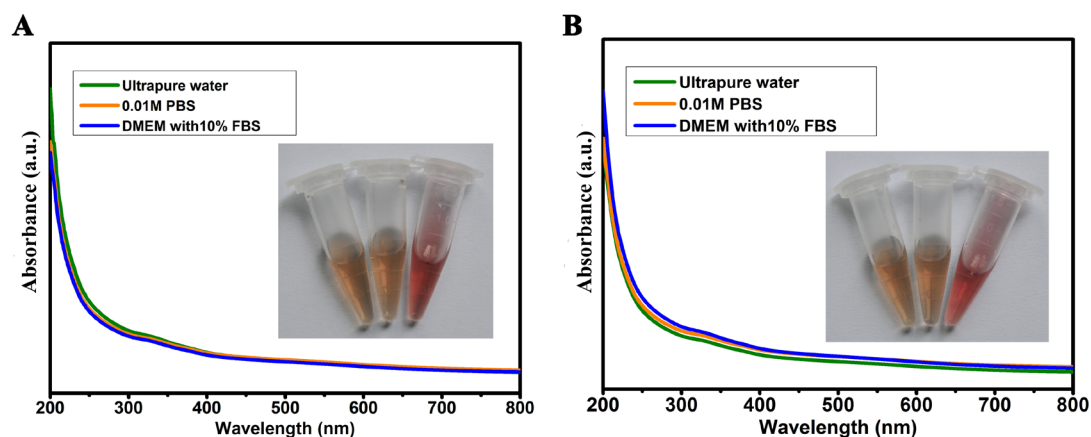

**Figure S4.** UV-vis absorption spectra (A) AuNCs@L-GSH and (B) AuNCs@D-GSH *in vitro*. (Insets) Digital photos of 1 mg/ml AuNCs@L-GSH and AuNCs@D-GSH in ultrapure water, 0.01M PBS and DMEM with 10% FBS (from left to right) for 24 h at 37 °C.

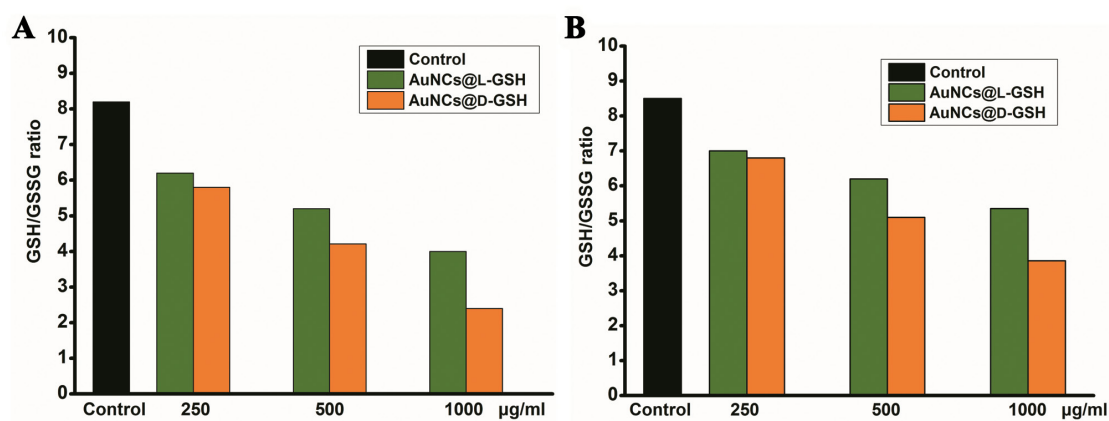

**Figure S5.** Intracellular GSH/GSSG ratio after Au NCs exposure. AuNCs@L-GSH and AuNCs@D-GSH significantly decreased the GSH/GSSG ratio in (A) MGC-803 and (B) GES-1 cells compared with untreated control, the data indicating a significant oxidative stress.

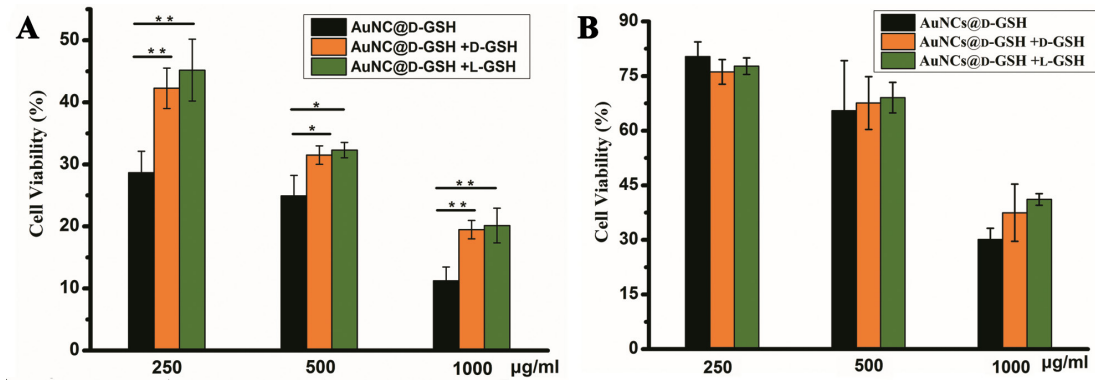

**Figure S6.** L-GSH and D-GSH can partially inhibit the cytotoxicity of AuNCs@D-GSH. (A) MGC-803 and (B) GES-1 cells incubated with AuNCs@D-GSH at several different concentrations and mixed with L-GSH and D-GSH respectively for another 24 h co-incubation. \* $p < 0.05$ , \*\* $p < 0.01$ , Student's *t*-test results at 95% confidence level were significantly different.

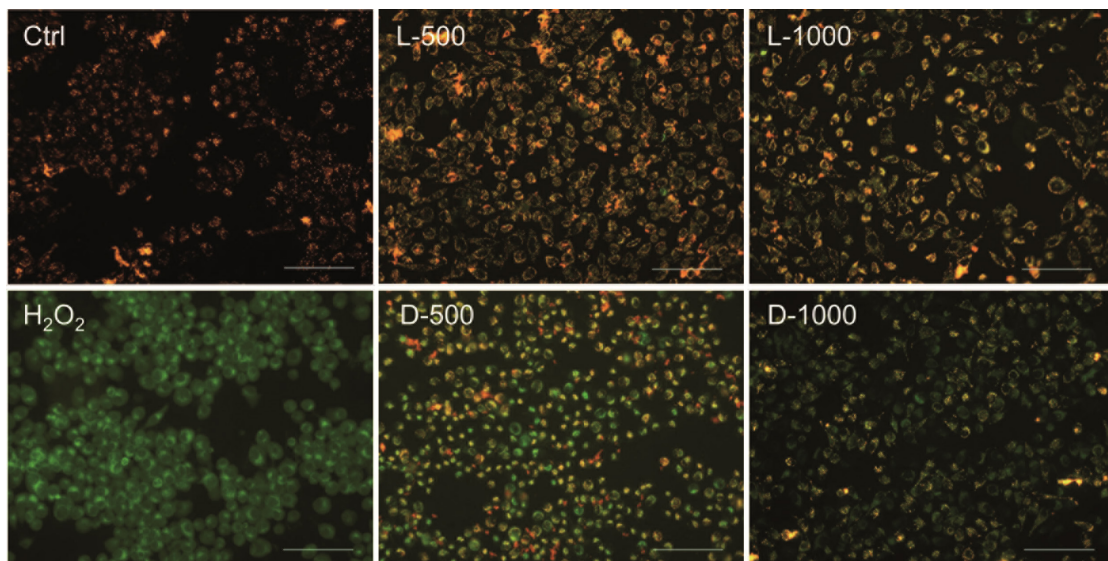

**Figure S7.** Fluorescent potential-dependent staining of mitochondria in GES-1 cells by JC-1 following exposure to Au NCs for 12 h. L-500, L-1000, D-500, D-1000 were denoted as GES-1 cells treated with 500 and 1000 µg/ml AuNCs@L-GSH, 500 and 1000 µg/ml AuNCs@D-GSH respectively. The cells were illuminated at 450-490 nm and the emission was collected with a 515 nm longpass optical filter. Scale bars: 100 µm.

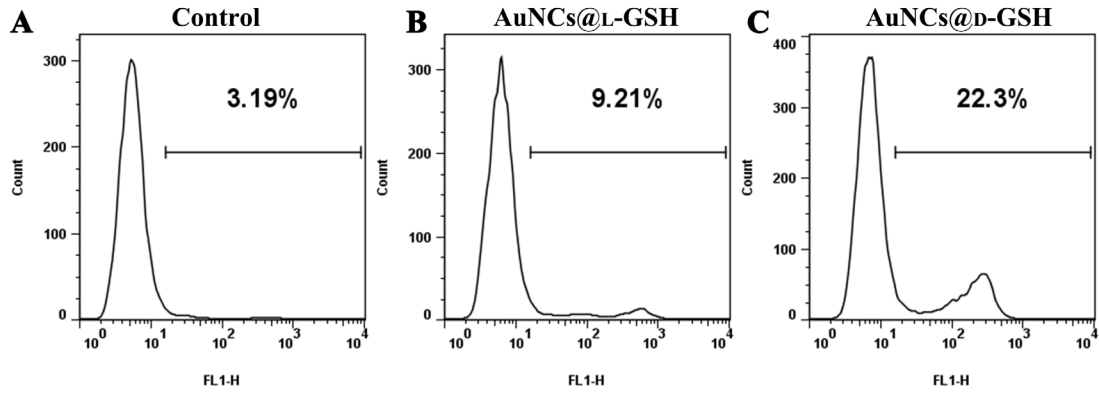

**Figure S8.** Flow cytometry analysis of the phosphorylation of H2AX. (A) GES-1 cells without any treatment. (B-C) GES-1 cells treated with 100  $\mu\text{g/ml}$  AuNCs@L-GSH and AuNCs@D-GSH for 24, respectively.

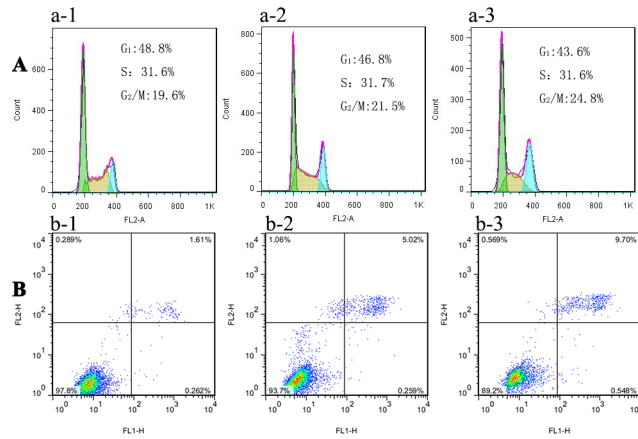

**Figure S9.** Flow cytometry analysis of (A) cell cycle phase distribution and (B) apoptosis/necrosis in GES-1 cells after exposure to (a-2, b-2) 100  $\mu\text{g/ml}$  AuNCs@L-GSH and (a-3, b-3) 100  $\mu\text{g/ml}$  AuNCs@D-GSH for 24 h, respectively. (a-1, b-1) Cells without any treatment.

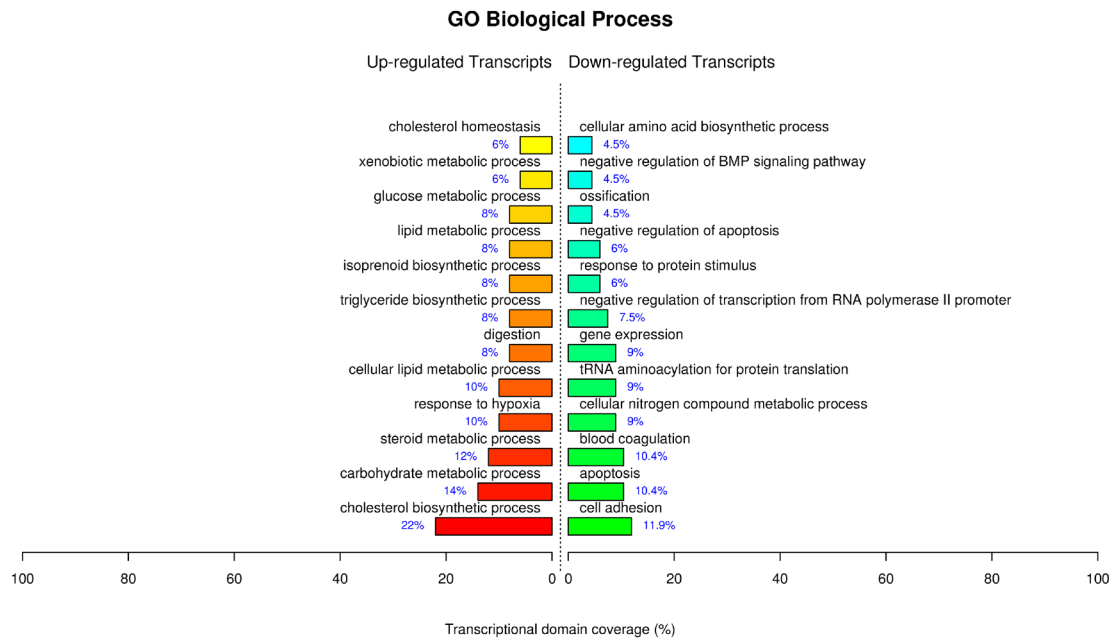

**Figure S10.** GO terms of *biological process* significantly affected by AuNCs@D-GSH.
